# Supplementary material for: Community ecology across bacteria, archaea and microbial eukaryotes in the sediment and seawater of coastal Puerto Nuevo, Baja California
Source: PLoS One. 2019 Feb 14;14(2):e0212355. doi: 10.1371/journal.pone.0212355 (PMC6375613; doi:10.1371/journal.pone.0212355)
Supplement: S5 Table — Metadata and number of raw reads for 16S and 18S OTU sequences. (CSV) [file pone.0212355.s005.csv]

Supplemental Table 5. OTU Metadata
	Name	Medium	Location	ID	X16S_Raw	X18S_Raw
1	SAMPLE_123257	Water	Sheltered	w_A1	166686	685386
2	SAMPLE_123258	Water	Sheltered	w_A2	216080	631158
3	SAMPLE_123259	Water	Sheltered	w_A3	164170	399306
4	SAMPLE_123260	Water	Sheltered	w_A4	179592	503782
5	SAMPLE_123261	Water	Minor Outlet	w_B1	169856	540666
6	SAMPLE_123262	Water	Minor Outlet	w_B2	242368	365934
7	SAMPLE_123263	Water	Minor Outlet	w_B3	193288	515174
8	SAMPLE_123264	Water	Minor Outlet	w_B4	166626	570120
9	SAMPLE_123265	Water	Major Outlet	w_C1	155240	430878
10	SAMPLE_123266	Water	Major Outlet	w_C2	151964	502298
11	SAMPLE_123267	Water	Major Outlet	w_C3	161824	625636
12	SAMPLE_123268	Water	Major Outlet	w_C4	188592	566678
13	SAMPLE_123269	Sediment	Sheltered	NA	164108	NA
14	SAMPLE_123270	Sediment	Sheltered	s_A2	162868	444642
15	SAMPLE_123271	Sediment	Sheltered	s_A3	183182	494348
16	SAMPLE_123272	Sediment	Sheltered	s_A4	167600	399930
17	SAMPLE_123273	Sediment	Minor Outlet	s_B1	141944	333104
18	SAMPLE_123274	Sediment	Minor Outlet	s_B2	158212	365878
19	SAMPLE_123276	Sediment	Minor Outlet	s_B4	185916	398278
20	SAMPLE_123277	Sediment	Major Outlet	s_C1	199970	391640
21	SAMPLE_123278	Sediment	Major Outlet	s_C2	175142	377060
22	SAMPLE_123279	Sediment	Major Outlet	s_C3	213262	478070
23	SAMPLE_123280	Sediment	Major Outlet	NA	208570	NA
